# Supplementary material
Source: Elsevier journal article supplement (https://www.sciencedirect.com/science/article/pii/S0300289621001812)
Supplement: mmc1 [file S0300289621001812:mmc1.pdf]

Supplemental Table 1: Diseases classification.

| <b>Disorders more prevalent in infancy</b>                                                              |
|---------------------------------------------------------------------------------------------------------|
| <b>Diffuse developmental disorders</b>                                                                  |
| Acinar dysplasia                                                                                        |
| Congenital alveolar dysplasia                                                                           |
| Alveolar capillary dysplasia with misalignment of pulmonary veins                                       |
| <b>Growth abnormalities</b>                                                                             |
| Chronic neonatal lung disease (not prematurity-related)                                                 |
| Structural pulmonary changes with chromosomal abnormalities ¶¶                                          |
| Associated with congenital heart disease in chromosomally normal children                               |
| <b>Specific conditions of undefined aetiology</b>                                                       |
| Primary Pulmonary interstitial glycogenosis §                                                           |
| Pulmonary interstitial glycogenosis associated with other disorders §                                   |
| Neuroendocrine cell hyperplasia of infancy                                                              |
| <b>Surfactant dysfunction mutations and related disorders</b>                                           |
| Surfactant protein B mutations ( <i>SFTPB</i> ; R)                                                      |
| Surfactant protein C mutations ( <i>SFTPC</i> ; D)                                                      |
| ABCA3 mutations ( <i>ABCA3</i> bi-allelic mutations)                                                    |
| Brain-lung-thyroid syndrome ( <i>NKX2-1/TTF-1</i> mutations; D) ¶¶                                      |
| Lysinuric protein intolerance ( <i>SLC7A7</i> ; R) ¶¶                                                   |
| Surfactant protein A mutations ( <i>SFTPA</i> ; D) ¶¶                                                   |
| Acquired pulmonary alveolar proteinosis / autoimmune ¶¶                                                 |
| <b>Histology with surfactant dysfunction disorder without a recognised genetic aetiology</b>            |
| Chronic pneumonitis of infancy                                                                          |
| Desquamative interstitial pneumonitis                                                                   |
| Nonspecific interstitial pneumonia                                                                      |
| Pulmonary fibrosis ¶¶                                                                                   |
| <b>Congenital multisystemic disorders and other genetic diseases</b>                                    |
| STING-associated vasculopathy with onset in infancy ( <i>TMEM173-STING</i> ; D) ¶¶                      |
| ILD associated to dyskeratosis congenita ( <i>DKC1</i> ; D) ¶¶                                          |
| Filamin A mutations ( <i>FLNA</i> ; D) ¶¶                                                               |
| Multisystemic Smooth Muscle Dysfunction ( <i>ACTA2</i> ; D) ¶¶                                          |
| <i>FARSB</i> , <i>MARS</i> and other <i>ARS</i> mutations ¶ (a) (R and D)                               |
| Pulmonary alveolar proteinosis due to GMCSF receptor deficiency ( <i>CSF2RA</i> , <i>CSF2RB</i> ; D) ¶¶ |
| COPA syndrome ( <i>COPA</i> ; D) ¶¶                                                                     |
| ILD associated to Arthrogyrosis-renal dysfunction-cholestasis syndrome ( <i>VPS33B</i> ; D) ¶¶(b)       |
| <b>Alveolar hemorrhage syndromes</b>                                                                    |
| Acute idiopathic pulmonary hemorrhage of infancy ¶¶                                                     |

Adapted from Deutsch GH, et al. Pathology Cooperative Group; ChILD Research Co-operative. Diffuse lung disease in young children: application of a novel classification scheme. *Am J Respir Crit Care Med.* 2007;176:1122. ¶¶ This category refers to the presence of alveolar simplification in chromosomal diseases. § Adapted from the original classification. ¶ Added entity not included in the original classification. (a) The only case in this group corresponds to a *FARSB* mutation. (b) Characterized by arthrogyrosis, renal tubular dysfunction and neonatal cholestasis, and platelet abnormalities and may be associated to pulmonary haemorrhage (personal observation). (c) Niemann-Pick type B (*SMPD1* 5), Niemann-Pick type A/B (*SMPD1* 1), Niemann-Pick type C1 (*NPC1* 2). (d) Only cases of BOOP non-related to transplantation or infection are included, other types of obliterans bronchiolitis are not included. Excluded entities from the original classification: pulmonary hypoplasia, prematurity-related chronic lung disease, infectious and postinfectious processes, aspiration syndromes, malignant infiltrates, opportunistic infections, disorders related to transplantation and rejection syndromes, veno-occlusive disease, congestive changes related to cardiac dysfunction. R: recessive biallelic mutation; D: dominant mutation; *SFTPB*: surfactant protein B; *SFTPC*: surfactant protein C; *ABCA3*: ATP-binding cassette 3; *TTF1*: thyroid transcription factor 1; *SLC7A7*: Solute Carrier Family 7 Member 7; *SFTPA*: surfactant protein A; *STING*: stimulator of interferon; *DKC1*: Dyskerin Pseudouridine Synthase 1; *FLNA*: Filamin A; *ACTA2*: Actin alpha 2; *FARSB*: Phenylalanine-tRNA synthetase Betachain; *MARS*: methionyl transfer RNA synthetase; *GMCSF*: Granulocyte-macrophage colony-stimulating factor; *CSF2RA*: Colony Stimulating Factor 2 Receptor Subunit Alpha; *CSF2RB*: Colony Stimulating Factor 2 Receptor Subunit Beta; *COPA*: non-clathrin-coated vesicular coat protein A; *VPS33B*: Vacuolar protein sorting 33. ILD: Interstitial Lung Disease; MPS: Mucopolysaccharidosis; SCID: severe combined immunodeficiency; ADA: adenosine deaminase; STAT1: Signal transducer and activator of transcription 1; M: months; Y: years.

## Supplemental Table 1 (cont.): Diseases classification

|                                                                                   |
|-----------------------------------------------------------------------------------|
| <b>Disorders not specific to infancy</b>                                          |
| <b>Disorders of the normal host</b>                                               |
| Hypersensitivity pneumonitis                                                      |
| Acute eosinophilic pneumonia                                                      |
| Chronic eosinophilic pneumonia                                                    |
| <b>Disorders related to systemic disease processes</b>                            |
| Rheumatoid arthritis                                                              |
| Mixed connective tissue disease                                                   |
| Scleroderma                                                                       |
| Granulomatosis with polyangiitis                                                  |
| Systemic lupus erythematosus                                                      |
| Antiphospholipid antibody syndrome                                                |
| Goodpasture Syndrome                                                              |
| ILD in inflammatory bowel disease (Crohn)                                         |
| ILD in dermatomyositis                                                            |
| Behcet disease                                                                    |
| Churg-Strauss syndrome                                                            |
| Chronic alveolar haemorrhage, microscopic polyangiitis ¶                          |
| ILD associated to leukocytoclastic vasculitis ¶                                   |
| Pulmonary lymphomatoid granulomatosis ¶                                           |
| Sarcoidosis                                                                       |
| Langerhans cell histiocytosis                                                     |
| Tuberous sclerosis ¶                                                              |
| <b>Storage diseases</b>                                                           |
| Niemann-Pick disease                                                              |
| Hermansky-Pudlak syndrome                                                         |
| Gaucher disease                                                                   |
| ILD associated to Mucopolidosis type II ¶                                         |
| Hurler syndrome (MPS I) ¶                                                         |
| Hunter syndrome (MPS II) ¶                                                        |
| <b>Other alveolar haemorrhage syndromes: Idiopathic pulmonary hemosiderosis ¶</b> |
| <b>Disorders of the immunocompromised host</b>                                    |
| ILD associated to Chronic granulomatous disease ¶                                 |
| Granulomatous Lymphocytic Interstitial Lung Disease ¶                             |
| ILD associated to Severe combined immunodeficiency (SCID) due to ADA deficiency ¶ |
| ILD associated to Medullary aplasia ¶                                             |
| ILD in LRBA deficiency ¶                                                          |
| ILD associated to Autoimmune lymphoproliferative syndrome (ALPS) ¶                |
| ILD related to Gain-of-function mutation in STAT1 ¶                               |
| Disorders related to therapeutic intervention: drugs                              |
| Disorders related to therapeutic intervention: radiotherapy                       |
| <b>Lymphatic disorders (Disorders masquerading as ILD)</b>                        |
| Primary lymphangiectasia                                                          |
| Diffuse pulmonary lymphangiomatosis                                               |
| <b>Other entities</b>                                                             |
| Lymphocytic interstitial pneumonia ¶                                              |
| Follicular bronchiolitis ¶                                                        |
| Bronchiolitis obliterans Organising pneumonia ¶ (d)                               |
| Alveolar microlithiasis ¶                                                         |
| Pleuroparenchymal fibroelastosis ¶                                                |
| <b>Lung disease with unknown cause</b>                                            |

Adapted from Deutsch GH, et al. Pathology Cooperative Group; ChILD Research Co-operative. Diffuse lung disease in young children: application of a novel classification scheme. *Am J Respir Crit Care Med.* 2007;176:1122. ¶ This category refers to the presence of alveolar simplification in chromosomal diseases. § Adapted from the original classification. ¶ Added entity not included in the original classification. (a) The only case in this group corresponds to a FARSB mutation. (b) Characterized by arthrogyposis, renal tubular dysfunction and neonatal cholestasis, and platelet abnormalities and may be associated to pulmonary haemorrhage (personal observation). (c) Niemann-Pick type B (*SMPD1*) 5, Niemann-Pick type A/B (*SMPD1*) 1, Niemann-Pick type C1 (*NPC1*) 2. (d) Only cases of BOOP non-related to transplantation or infection are included, other types of obliterans bronchiolitis are not included. Excluded entities from the original classification: pulmonary hypoplasia, prematurity-related chronic lung disease, infectious and postinfectious processes, aspiration syndromes, malignant infiltrates, opportunistic infections, disorders related to transplantation and rejection syndromes, veno-occlusive disease, congestive changes related to cardiac dysfunction. R: recessive biallelic mutation; D: dominant mutation; STFPB: surfactant protein B; STFPC: surfactant protein C; ABCA3: ATP-binding cassette 3; TTF1: thyroid transcription factor 1; SLC7A7: Solute Carrier Family 7 Member 7; STFPA: surfactant protein A; STING: stimulator of interferon; DKC1: Dyskerin Pseudouridine Synthase 1; FLNA: Filamin A; ACTA 2: Actin alpha 2; FARSB: Phenylalanine-tRNA synthetase Betachain; MARS: methionyl transfer RNA synthetase; GMCSF: Granulocyte-macrophage colony-stimulating factor; CSF2RA: Colony Stimulating Factor 2 Receptor Subunit Alpha; CSF2RB: Colony Stimulating Factor 2 Receptor Subunit Beta; COPA: non-clathrin-coated vesicular coat protein A; VPS33B: Vacuolar protein sorting 33. ILD: Interstitial Lung Disease; MPS: Mucopolysaccharidosis; SCID: severe combined immunodeficiency; ADA: adenosine deaminase; STAT1: Signal transducer and activator of transcription 1; M: months; Y: years.

Supplemental Table 2. Participants and data collection

| Region                                   | Province                    | Population <18y (2018) | Population <18y (2019) | Hospital                                             | New cases 2018                              | New cases 2019 | Prevalent cases 2018 | Prevalent cases 2019 |    |
|------------------------------------------|-----------------------------|------------------------|------------------------|------------------------------------------------------|---------------------------------------------|----------------|----------------------|----------------------|----|
| Andalucía                                | Almería                     | 144.867                | 145.658                | Hospital Universitario Torrecárdenas                 | 2                                           | 0              | 4                    | 4                    |    |
|                                          | Cádiz                       | 242.914                | 240.335                | Hospital Universitario de Jerez                      | 0                                           | 0              | 0                    | 0                    |    |
|                                          | Córdoba                     | 139.888                | 138.412                | Hospital Universitario Reina Sofia                   | 0                                           | 0              | 14                   | 14                   |    |
|                                          | Granada                     |                        | 171.049                | 170.133                                              | Hospital Universitario Clínico San Cecilio  | 0              | 4                    | 0                    | 4  |
|                                          |                             |                        |                        |                                                      | Hospital Universitario Virgen de las Nieves | 0              | 5                    | 5                    | 10 |
|                                          | Málaga                      | 313.603                | 314.191                | Hospital Regional Universitario de Málaga            | 3                                           | 0              | 11                   | 11                   |    |
| Sevilla                                  |                             | 388.842                | 385.635                | Hospital Universitario Virgen del Rocío              | 11                                          | 10             | 58                   | 68                   |    |
|                                          |                             |                        |                        | Hospital Universitario Virgen Macarena               | 0                                           | 0              | 2                    | 2                    |    |
| Aragón                                   | Zaragoza<br>Huesca, Teruel* | 224.054                | 224.324                | Hospital Universitario Miguel Servet                 | 1                                           | 1              | 7                    | 8                    |    |
| Principado Asturias                      | Asturias                    | 135.285                | 133.937                | Hospital Universitario Central de Asturias           | 0                                           | 0              | 1                    | 1                    |    |
| Islas Baleares                           | Baleares                    | 211.779                | 212.954                | Hospital Universitari Son Espases                    | 3                                           | 3              | 12                   | 15                   |    |
| Canarias                                 | Las Palmas                  | 190.301                | 187.775                | Hospital Universitario Materno Infantil Canarias     | 2                                           | 2              | 3                    | 5                    |    |
|                                          | Santa Cruz de Tenerife      | 168.567                | 168.023                | Hospital Universitario de Canarias                   | 3                                           | 1              | 6                    | 7                    |    |
|                                          |                             |                        |                        | Hospital Universitario Nuestra Sra. Candelaria       | 0                                           | 0              | 2                    | 2                    |    |
| Cantabria                                | Cantabria                   | 93.079                 | 92.344                 | Hospital Universitario Marqués de Valdecilla         | 0                                           | 0              | 1                    | 1                    |    |
| Castilla La Mancha                       | Toledo                      | 134.863                | 135.878                | Hospital Universitario de Toledo                     | 0                                           | 0              | 0                    | 0                    |    |
| Castilla y León                          | León                        | 60.037                 | 59.189                 | Complejo Asistencial Universitario de León           | 0                                           | 0              | 0                    | 0                    |    |
|                                          | Salamanca                   | 47.115                 | 46.619                 | Hospital Universitario de Salamanca                  | 1                                           | 1              | 1                    | 1                    |    |
|                                          | Valladolid                  | 82.657                 | 82.182                 | Hospital Clínico Universitario de Valladolid         | 0                                           | 0              | 0                    | 0                    |    |
| Cataluña                                 | Barcelona                   | 1.029.161              | 1.030.918              | Hospital Universitari Vall d'Hebron                  | 4                                           | 8              | 40                   | 48                   |    |
|                                          |                             |                        |                        | Hospital Sant Joan de Déu                            | 4                                           | 2              | 15                   | 17                   |    |
|                                          |                             |                        |                        | Consorci Corporació Sanitària Parc Taulí Sabadell    | 3                                           | 2              | 6                    | 8                    |    |
|                                          |                             |                        |                        | Hospital Universitari Germans Trias i Pujol          | 0                                           | 0              | 2                    | 2                    |    |
|                                          | Girona                      | 147.321                | 147.996                | Hospital de la Santa Creu i Sant Pau                 | 0                                           | 0              | 0                    | 0                    |    |
|                                          |                             |                        |                        | Hospital Universitari Dr. Josep Trueta               | 0                                           | 0              | 0                    | 0                    |    |
|                                          | Lleida                      | 77.922                 | 78.212                 | Hospital Universitari Arnau de Vilanova              | 0                                           | 0              | 0                    | 0                    |    |
|                                          |                             |                        |                        | Hospital Universitari Joan XXIII                     | 0                                           | 0              | 0                    | 0                    |    |
| Extremadura                              | Badajoz                     | 117.238                | 115.680                | Hospital Universitario de Badajoz                    | 0                                           | 1              | 1                    | 2                    |    |
|                                          | Cáceres                     | 60.224                 | 59.236                 | Hospital Universitario de Cáceres                    | 0                                           | 0              | 0                    | 0                    |    |
| Galicia                                  | La Coruña                   | 349.600                | 347.614                | Complejo Hospitalario Universitario A Coruña         | 0                                           | 0              | 0                    | 0                    |    |
|                                          | Lugo, Pontevedra*           |                        |                        | Hospital Clínico Universitario de Santiago           | 2                                           | 3              | 6                    | 7                    |    |
|                                          | Orense                      | 36.516                 | 36.435                 | Complejo Hospitalario Universitario de Ourense       | 0                                           | 0              | 2                    | 2                    |    |
| Comunidad de Madrid                      | Madrid                      | 1.228.148              | 1.231.516              | Hospital Universitario La Paz                        | 8                                           | 1              | 12                   | 13                   |    |
|                                          |                             |                        |                        | Hospital General Universitario Gregorio Marañón      | 0                                           | 0              | 12                   | 12                   |    |
|                                          |                             |                        |                        | Hospital Universitario 12 de Octubre                 | 0                                           | 1              | 10                   | 11                   |    |
|                                          |                             |                        |                        | Hospital Universitario Puerta De Hierro              | 1                                           | 1              | 1                    | 1                    |    |
|                                          |                             |                        |                        | Hospital Infantil Universitario Niño Jesús           | 2                                           | 2              | 23                   | 21                   |    |
|                                          |                             |                        |                        | Hospital Clínico San Carlos                          | 0                                           | 0              | 0                    | 0                    |    |
|                                          |                             |                        |                        | Hospital Universitario Ramón y Cajal                 | 0                                           | 1              | 0                    | 1                    |    |
| Clínica Universidad de Navarra de Madrid | 0                           | 0                      | 0                      | 0                                                    |                                             |                |                      |                      |    |
| Región de Murcia                         | Murcia                      | 306.833                | 306.798                | Hospital Clínico Universitario Virgen de la Arrixaca | 4                                           | 4              | 24                   | 28                   |    |
| Comunidad Navarra                        | Navarra                     | 121.250                | 121.715                | Complejo Hospitalario de Navarra                     | 0                                           | 0              | 1                    | 1                    |    |
| País Vasco                               | Guipuzcoa                   | 124.318                | 123.754                | Hospital Universitario Donostia                      | 1                                           | 0              | 4                    | 4                    |    |
|                                          |                             |                        |                        | Hospital de Zumárraga                                | 0                                           | 0              | 0                    | 0                    |    |
|                                          | Vizcaya                     | 184.224                | 183.912                | Hospital Universitario Cruces                        | 3                                           | 1              | 4                    | 5                    |    |
|                                          |                             |                        |                        | Hospital Universitario Basurto                       | 1                                           | 2              | 3                    | 5                    |    |
| Comunidad Valenciana                     | Alicante                    | 328.366                | 329.900                | Hospital General de Alicante                         | 2                                           | 0              | 3                    | 3                    |    |
|                                          | Valencia                    | 631.037                | 630.564                | Hospital Clínico Universitario de Valencia           | 1                                           | 5              | 29                   | 32                   |    |
|                                          | Castellón, Albacete*        |                        |                        | Hospital de Manises                                  | 1                                           | 0              | 1                    | 1                    |    |
|                                          |                             |                        |                        | Hospital Universitario y Politécnico de La Fe        | 1                                           | 0              | 4                    | 4                    |    |
| Total                                    |                             | 7.644.155              | 7.636.093              |                                                      | 64                                          | 61             | 330                  | 381                  |    |

\*Population of areas with a referral hospital in a province which is not their place of residence has been added. Y:years
